# Supplementary material for: Correlates of hybridization in plants
Source: PubMed Central journal article supplement (PMC6906982; doi:10.1002/evl3.146), 2019-10-28

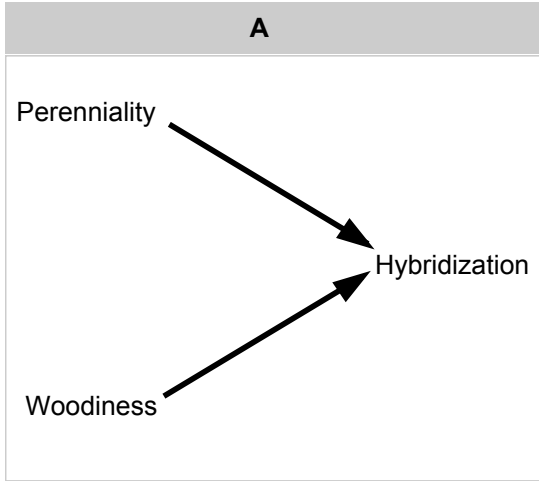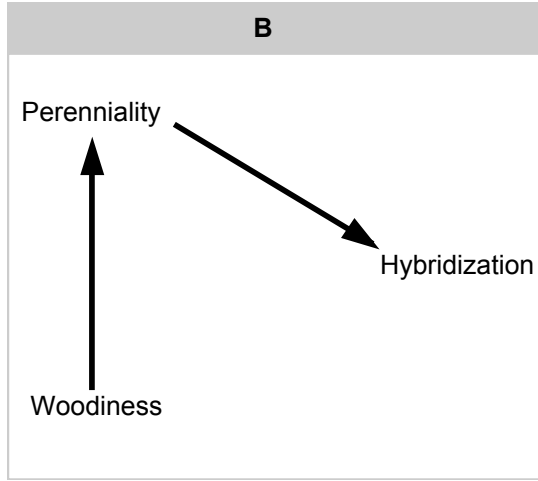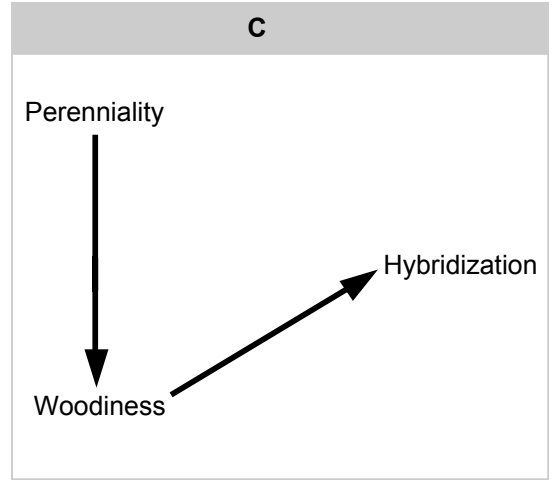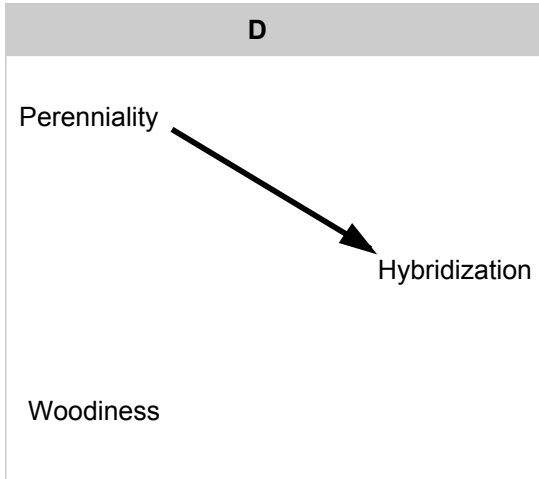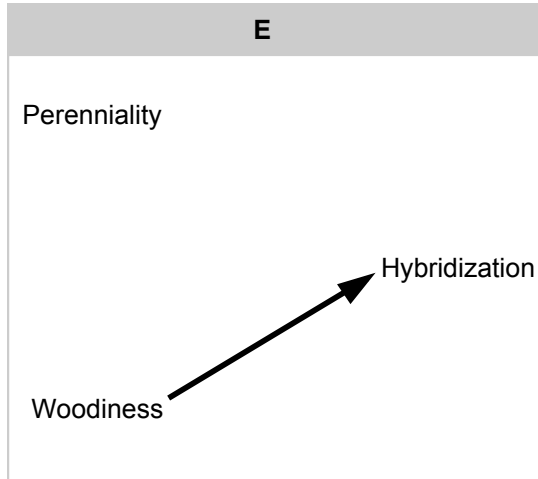

Supplement: EVL3-3-570-s001.pdf [file EVL3-3-570-s001.pdf]
